1 **Title**

2  
3 Knock-in tagging in zebrafish facilitated by insertion into non-coding regions

4  
5  
6 **Running title**

7  
8 Endogenous tagging in zebrafish

9  
10  
11 **Authors**

12  
13 Daniel S. Levic<sup>1\*</sup>, Naoya Yamaguchi<sup>2</sup>, Siyao Wang<sup>1</sup>, Holger Knaut<sup>2</sup>, Michel Bagnat<sup>1\*</sup>

14  
15 <sup>1</sup>Department of Cell Biology, Duke University, Durham, NC, United States; <sup>2</sup>Skirball Institute of  
16 Biomolecular Medicine, New York University Grossman School of Medicine, NY, United States

17  
18 \*Correspondence to Michel Bagnat: [michel.bagnat@duke.edu](mailto:michel.bagnat@duke.edu) or Dan Levic: [daniel.levic@duke.edu](mailto:daniel.levic@duke.edu)

19  
20  
21 **Keywords**

22  
23 Zebrafish, knock-in, epithelial, morphogenesis, CRISPR, quantitative imaging

24  
25  
26 **Summary statement**

27  
28 Generation of endogenously tagged stable zebrafish knock-in lines is simplified by the integration of  
29 fluorescent protein cassettes with mRNA splicing elements into non-coding regions of genes.

30  
31  
32 **Abstract**

33  
34 Zebrafish provide an excellent model for *in vivo* cell biology studies due to their amenability to live  
35 imaging. Protein visualization in zebrafish has traditionally relied on overexpression of fluorescently tagged  
36 proteins from heterologous promoters, making it difficult to recapitulate endogenous expression patterns  
37 and protein function. One way to circumvent this problem is to tag the proteins by modifying their  
38 endogenous genomic loci. Such an approach is not widely available to zebrafish researchers due to  
39 inefficient homologous recombination and the error-prone nature of targeted integration in zebrafish. Here,  
40 we report a simple approach for tagging proteins in zebrafish on their N- or C termini with fluorescent  
41 markers by inserting PCR-generated donor amplicons into non-coding regions of the corresponding  
42 genes. Using this approach, we generated endogenously tagged alleles for several genes critical for  
43 epithelial biology and organ development including the tight junction components ZO-1 and Cldn15la, the  
44 trafficking effector Rab11a, and the ECM receptor  $\beta$ 1 integrin. Our approach facilitates the generation of  
45 knock-in lines in zebrafish, opening the way for accurate quantitative imaging studies.

46

## 47 Introduction

48

49 Live imaging of fluorescently tagged proteins is an important tool for understanding gene function. In  
50 zebrafish, protein visualization has traditionally relied on overexpression studies in which tagged proteins  
51 are generated by microinjection of synthetic mRNA or by random integration of small transgenes (Kwan et  
52 al., 2007). These approaches are inherently limited because overexpression seldom recapitulates  
53 endogenous gene expression levels and spatiotemporal patterns. Large bacterial artificial chromosome  
54 (BAC) transgenes (Bussmann and Schulte-Merker, 2011, Navis et al., 2013, Alvers et al., 2014,  
55 Rodriguez-Fraticelli et al., 2015, Fuentes et al., 2016) can recapitulate the endogenous expression pattern  
56 and levels if they include the necessary regulatory sequences. However, regulatory sequences can reside  
57 hundreds of kilobases up- and downstream from the gene of interest and may be too far away to be  
58 included on a BAC transgene. Moreover, expression levels of BAC transgenes have been demonstrated  
59 to vary depending on the genomic insertion site (Fuentes et al., 2016) and the number of BAC transgene  
60 copies that are inserted (Chandler et al., 2007). The most accurate way to recapitulate physiological gene  
61 expression level and pattern is to tag the gene directly at its endogenous genomic locus to produce fusion  
62 proteins (Gibson et al., 2013), an approach commonly referred to as knock-in (KI). Recently, with the  
63 advent of CRISPR-Cas9 gene editing, KI has become feasible in cell lines and many model organisms  
64 (Dickinson et al., 2015, Koles et al., 2016, Dewari et al., 2018, Gao et al., 2019, Cronan and Tobin, 2019).  
65 In zebrafish, homology-based methods for generating KI lines have been described (Hoshijima et al.,  
66 2016, Wierson et al., 2020, Ranawakage et al., 2021). However, the available methods are difficult to  
67 implement and rely on inefficient DNA repair pathways, which are required for the precise integration of  
68 DNA the size of fluorescent protein sequences into the genome (Peng et al., 2014). As a result, only a few  
69 zebrafish KI lines expressing fluorescently tagged fusion proteins have been reported thus far. Moreover,  
70 endogenous N-terminal tagging, with the exception of the insertion of small peptides (Hoshijima et al.,  
71 2016, Ranawakage et al., 2021), has not been feasible in zebrafish. To circumvent these challenges, we  
72 devised a simple KI approach where precise integration is not needed for expression of endogenously  
73 tagged proteins. We targeted non-coding regions of genes, such as introns and 5' untranslated regions (5'  
74 UTRs), for integration of targeting cassettes that code for fluorescent proteins. In this manner, imprecise  
75 integration events do not affect the expression of the tagged proteins because non-coding sequences  
76 targeted by CRISPR-Cas9 are removed from the transcripts during RNA splicing. We used this approach  
77 to generate stable zebrafish KI lines for several proteins tagged on their N- or C-terminus by integrating  
78 the sequence for fluorescent proteins at the endogenous genomic loci. KI tagging in zebrafish opens the  
79 door for quantitative imaging studies, such as quantifying endogenous protein levels. As proof of principle,  
80 we measured the concentration of endogenous eGFP-Rab11a molecules on apical vesicles within  
81 different epithelial organs.

82

## 83 Results and Discussion

84

85 To establish a method for endogenously tagging proteins in zebrafish, we devised an approach to  
86 integrate cassettes coding for fluorescent proteins into non-coding regions of genes. For C-terminal  
87 tagging, we used CRISPR-Cas9 to induce a double strand DNA (dsDNA) break in the intron preceding the  
88 last exon (Fig. 1A). We induced cutting in the intron at least 100 base pairs (bp) upstream of the last exon  
89 to minimize potential interference with pre-mRNA splicing (Fig. 1A). Together with Cas9 and the gRNA, we  
90 co-injected linear dsDNA PCR donor amplicons spanning part of the last intron and the coding sequence  
91 of the last exon of the gene of interest fused to the coding sequence of a fluorescent protein and a  
92 polyadenylation (polyA) sequence (Fig. 1B). The intron serves as a splice acceptor element. Integration of  
93 the donor can proceed through non-homologous end joining (NHEJ) at the 5' and 3' ends (Fig. 1C).  
94 Provided the cassette integrates in the correct orientation, expression of the modified transcript can  
95 tolerate errors, such as insertion-deletion mutations (INDELS), at integration boundaries because these  
96 sequences are removed during RNA splicing (Fig. 1D). Tagging the C-terminus of many proteins can  
97 impair their function. To circumvent this potential limitation, we also devised a strategy to add tags to the  
98 N-terminus of proteins. We induced dsDNA breaks in non-coding regions upstream of the start codon of

99 the gene of interest using CRISPR-Cas9 (Fig. 1E). As described above, we co-injected a PCR donor  
100 amplicon, but the N-terminal tagging repair donors contain an approximately 500 bp homology arm (the  
101 endogenous sequence upstream from the dsDNA break). The homology arm was fused to the remaining  
102 upstream non-coding sequence, the coding sequence of a fluorescent protein, the coding sequence of the  
103 endogenous exon that harbors the start codon, and a portion of the following intron, which functions as a  
104 splice donor element (Fig. 1F). To promote homology-directed repair (HDR)-mediated integration at the 5'  
105 end of the repair donor in the UTR, we mutated the gRNA target site in the repair donor (Fig. 1F).  
106 Integration of the 3' end of the N-terminal repair donor does not require precise insertion by HDR because  
107 the intronic portion of the donor sequence is removed from transcripts during RNA splicing. (Fig. 1G-H).  
108

109 For certain endogenously tagged alleles, such as p2A-Cre or fusions to low-expressing genes, visual  
110 screening of a fluorescent protein is not feasible in the absence of other markers or transgenes. Therefore,  
111 we also devised a slightly modified approach for inserting larger sequences. We constructed a donor  
112 plasmid in which an endogenous splice acceptor element and the coding sequence of the last exon is  
113 cloned upstream of a tag of interest followed by a polyA sequence. The splice acceptor element in the  
114 donor plasmid is targeted and linearized by the same gRNA target site as the endogenous genomic intron.  
115 Integration of the donor and expression of the modified transcript follows similar principles as described for  
116 PCR donors, but this approach allows for the addition of larger cassettes that include transgenesis  
117 markers. Using this strategy, insertions can be identified based on the expression of the transgenesis  
118 marker but orientation of the insertion and expression of the tagged protein need to be confirmed by  
119 sequencing across the modified genomic region and by immunohistochemistry, respectively.  
120

121 Using these approaches, we tagged several genes that have critical roles in epithelial biology and  
122 morphogenesis at their endogenous genomic loci. We injected a knock-in (KI) cocktail containing Cas9  
123 protein, sgRNAs or synthetic crRNA/tracrRNA complexes, and PCR donor amplicons or plasmid into 1-cell  
124 stage embryos. We then visually screened embryos for fluorescence and compared it to the reported  
125 spatiotemporal mRNA expression patterns of the endogenous transcripts (Howe et al., 2021). We  
126 consistently observed expression of the fusion proteins in 1-5% of the injected embryos. Injected embryos  
127 with fluorescent protein expression showed varying levels of mosaicism (Fig. S1A-C). This mosaicism,  
128 combined with the highly restricted subcellular localization and endogenous levels of some proteins like  
129 aPKC (encoded by *prkc1*) and ZO1 (encoded by *tjp1a*), required us to use confocal microscopy to identify  
130 embryos with insertions of fluorescent protein encoding repair donor sequences (Fig. S1A-C).  
131

132 To optimize conditions for endogenous tagging in zebrafish, we focused on *rab11a* because this gene  
133 exhibits widespread expression throughout embryonic and larval stages and insertion of the repair donor  
134 can easily be scored by visual screening (Fig. S2A). We prepared PCR donor amplicons for *rab11a* while  
135 modifying the gRNA target site position and mutating the gRNA sequence on the donor. We also  
136 compared dsDNA and single-stranded DNA (ssDNA) as repair donors. Although mutating the gRNA target  
137 site on the donor was not required for KI, this resulted in a >2-fold increase in efficiency (Fig. S2B-C).  
138 However, inducing dsDNA breaks on both the 5' and 3' ends of the integration site did not enhance KI  
139 efficiency, nor did using ssDNA as repair donor instead of dsDNA (Fig. S2B-C).  
140

141 To determine the germline transmission efficiency of our approach, we targeted three genes (*cldn15la*,  
142 *rab11a*, and *tjp1a*) and raised only those injected embryos that showed mosaic expression to adulthood  
143 (F0). We then outcrossed 3–5 F0 animals for each target to wild-type (WT) fish and determined the  
144 percentage of stably expressing F1 embryos. *cldn15la* and *tjp1a*, targeted for C-terminal tagging of the  
145 gene products, showed similar levels of germline transmission rates (Fig. S3). Overall, targeting *cldn15la*  
146 and *tjp1a* resulted in 26.9% and 17.1% of F1 progeny showing expression, respectively (Fig. S3).  
147 Interestingly, we observed similar levels of efficiency despite using tdTomato (~1400 bp) as a tag for  
148 *cldn15la* and eGFP (~700 bp) for *tjp1a*, suggesting that insertion sizes in this range likely do not impact KI  
149 efficiency. For N-terminal tagging, we compared *rab11a* KI using dsDNA or ssDNA as donor repair  
150 sequences. Similar to F0 expression efficiency, using ssDNA as a repair donor did not improve the

151 efficiency of obtaining stably expressing F1 embryos (Fig. S3), indicating that simple dsDNA PCR donor  
152 amplicons are effective for KI in zebrafish.

153  
154 We next monitored the spatiotemporal expression patterns and subcellular localization of endogenously  
155 tagged proteins in stably expressing F2 larvae. ZO1 (Tjp1a) is a peripheral component of tight junctions  
156 and is localized cortically in epithelial cells (Zihni et al., 2016). ZO1-tdTomato showed widespread  
157 expression in epithelial organs through the body at embryonic and larval stages, with enrichment in the  
158 lens, floor plate, neural tube, vasculature, and intestine (Fig. 2A). In the eye, ZO1-tdTomato was present in  
159 the lens epithelium and was also enriched in closely apposed lens fiber cells (Fig. 2B, Movie 1). Close  
160 examination of ZO1-tdTomato in the trunk revealed enrichment within the dorsal aorta, caudal vein,  
161 intersegmental vessels, and notochord sheath cells (Fig. 2C, Movie 2). ZO1-tdTomato also labeled  
162 epithelial cells throughout the otic capsule, including sensory cells of cristae and those lining the canals  
163 (Fig. 2D, Movie 3). We also generated a line expressing endogenously tagged ZO1-eGFP and when  
164 crossed to the ZO1-tdTomato line, the two proteins showed identical expression patterns and co-localized  
165 intracellularly (Fig. S4A). In the epidermis, endogenously tagged ZO1 was highly expressed in lateral line  
166 neuromasts while in periderm cells it showed enrichment at tricellular junctions (Fig. S4B-C).

167  
168 To specifically label intestinal epithelial cells (IECs), we targeted *cldn15la*, which encodes a member of the  
169 claudin family of tetraspanin membrane proteins that regulate tight junction assembly and function.  
170 Cldn15la is an atypical member of the claudin family that is not restricted to tight junctions and is instead  
171 localized along basolateral membranes (Alvers et al., 2014). Similar to the transgenic *TgBAC(cldn15la-*  
172 *GFP)<sup>pd1034</sup>* allele (Alvers et al., 2014), endogenously tagged Cldn15la-tdTomato was expressed in all IECs  
173 (Fig. 2E-F), where it was present on basolateral membranes throughout gut development (Fig. 2G-H). Of  
174 note, unlike the *TgBAC(cldn15la-GFP)<sup>pd1034</sup>* allele which is homozygous lethal, *TgKI(cldn15la-*  
175 *tdTomato)<sup>pd1249</sup>* was well tolerated in homozygous animals.

176  
177 To visualize cell-ECM adhesions with an endogenous protein in live zebrafish, we generated an *itgb1b-*  
178 *tdTomato* KI line. Consistent with prior studies (Martinez-Morales et al., 2009, Sidhaye and Norden, 2017),  
179 Itgb1b-tdTomato was clearly enriched at the basal membrane of the cells in the optic cup at 28 hpf. We  
180 also confirmed prominent enrichment of Itgb1b-tdTomato in myotendinous junctions at the somite  
181 boundaries (Jülich et al., 2005). These observations suggest that *itgb1b-tdTomato* faithfully reports the  
182 localization of Itgb1b in live zebrafish.

183  
184 To establish a zebrafish model for *in vivo* studies of membrane trafficking, we generated a KI line  
185 expressing N-terminally tagged eGFP-Rab11a. Live imaging revealed that eGFP-Rab11a is nearly  
186 ubiquitously expressed and enriched in epithelial organs (Fig. 3A, Movie 4). In transverse sections of the  
187 posterior intestine, eGFP-Rab11a was highly expressed and localized apically in lysosome-rich  
188 enterocytes (LREs) (Park et al., 2019) and epithelial cells of the pronephros (Fig. 3B). The apical  
189 localization of eGFP-Rab11a in zebrafish IECs resembles that of endogenous Rab11a by immunostaining  
190 (Levic et al., 2020). Among lower expressing tissues, eGFP-Rab11a was still easily detected in transverse  
191 sections of skeletal muscle, notochord sheath cells, and notochord vacuolated cells (Fig. 3C). Live  
192 imaging revealed dynamic movement of eGFP-Rab11a in the cytoplasm of notochord vacuolated cells  
193 (Movie 5). We also noted high enrichment of eGFP-Rab11a in lateral line neuromasts by live imaging (Fig.  
194 3A). Within neuromasts, eGFP-Rab11a expression was restricted to hair cells, where it was enriched  
195 apically near stereocilia of the apical membrane (Fig. 3D). eGFP-Rab11a was also present at basal  
196 puncta that may represent contact sites from neurons that innervate neuromasts (Fig. 3D). Accordingly,  
197 we detected enriched expression of eGFP-Rab11a in tracts and projections of neurons that underlie  
198 neuromasts (Fig. 3E-F).

199  
200 Having shown that proteins can be tagged endogenously we tested whether our KI lines can be used to  
201 determine their relative cellular abundance. To explore this question, we adapted a microscopy-based  
202 approach to measure the concentration of GFP molecules on diffraction limited vesicles on zebrafish



203 tissue sections to estimate the number of eGFP-Rab11a molecules per vesicle. While this technique is  
204 commonly used in *in vitro* models (Clayton, 2018, Marques et al., 2019, Escamilla-Ayala et al., 2020),  
205 quantitative imaging of animal tissues can be obscured by factors such as autofluorescence and light  
206 scattering. Therefore, to establish baseline standards, we measured the photon emission of purified eGFP  
207 particles when imaged on zebrafish tissue sections. We collected intestinal tissue sections of eGFP-  
208 negative WT larvae (Fig. 4A), incubated a solution of purified eGFP at low concentration, and then  
209 crosslinked eGFP particles to the tissue surface by fixation (Fig. 4B). We collected accumulated photon  
210 counts of eGFP particles and then photobleached them (Fig. 4C). During photobleaching we monitored  
211 signal intensity and inferred the original number of eGFP molecules in the particle based on the signal  
212 decay profile (Fig. 4D). Using this approach, we identified eGFP particles containing 1-3 molecules that  
213 exhibited a linear increase in photon emission (Fig. 4E-F). Coincidentally, background level emission from  
214 tissue autofluorescence generated approximately the same number of photon counts as a single eGFP  
215 molecule, on average (Fig. 4F). Next, we prepared eGFP-Rab11a KI larvae and performed single particle  
216 imaging of diffraction limited apical vesicles on tissue sections (Fig. 4G-H) using identical processing and  
217 imaging conditions as described above. Although Rab11a expression levels vary by more than 2-fold at  
218 the mRNA levels in LREs vs. IECs (Park et al., 2019), endogenously tagged eGFP-Rab11a concentration  
219 on apical vesicles did not change in proportion (Fig. 4I). However, the relative distribution profile for LREs  
220 did reveal an increase in the fraction of vesicles containing >3 molecules (Fig. 4J), possibly reflecting a  
221 pool of vesicles that function in protein uptake in these specialized enterocytes (Park et al., 2019).  
222

223 In this study, we describe a simple and effective approach to tag genes with targeting cassettes encoding  
224 fluorescent proteins at their endogenous genomic loci in zebrafish. While CRISPR and Zinc Finger  
225 Nuclease gene editing have been used to generate knock-in zebrafish lines to study promoter activity  
226 (Kimura et al., 2014, Hoshijima et al., 2016, Li et al., 2019), there are few published examples of C-  
227 terminally tagged KI fusion lines (Cronan and Tobin, 2019) and, with the exception of small peptide  
228 insertions (Hoshijima et al., 2016, Ranawakage et al., 2021), there are no reported examples of stable  
229 zebrafish KI lines of N-terminally tagged proteins. This scarcity may reflect the highly error prone nature of  
230 HDR in zebrafish. Our approach is unique because integration errors, such as INDELS, in non-coding  
231 gene regions can still mediate proper expression at the protein level because integration boundaries are  
232 excluded by RNA splicing. During the preparation of this manuscript, a similar endogenous tagging  
233 approach was reported for cultured mammalian cells (Zhong et al., 2021). Additionally, a related technique  
234 for targeted protein trapping by intronic insertion of artificial exons has been demonstrated to work for  
235 cultured mammalian cells (Serebrenik et al., 2019). In contrast to these examples, we sought to minimize  
236 the integration of undesired plasmid DNA elements by injecting PCR donor amplicons that only encode  
237 the relevant functional elements. Following this approach, we generated stable zebrafish KI fusion lines for  
238 several integral membrane and membrane associated proteins critical for epithelial development and cell  
239 physiology. Using quantitative imaging, we used one of these stable lines to measure the concentration of  
240 eGFP-Rab11a molecules on apical vesicles in different epithelial organs. Importantly, because genes are  
241 tagged at the endogenous locus, the zebrafish lines presented here improve accuracy and allow  
242 experimental approaches not feasible with traditional transgenic lines. These include the abilities to  
243 recapitulate spatiotemporal expression patterns of endogenous genes and to precisely quantify protein  
244 levels using single particle imaging or related techniques like fluorescence correlation spectroscopy (Wang  
245 et al., 2018). They also can facilitate uncovering protein interaction networks and dynamics without  
246 overexpression artifacts (Ahmed et al., 2018) and acute manipulation of protein function using conditional  
247 loss-of-function approaches such as degron-mediated protein depletion (Daniel et al., 2018, Yamaguchi et  
248 al., 2019). One factor that can impact expression levels of endogenously tagged proteins is the 3' UTR  
249 used in the repair donor sequence. The 3' tagged lines shown here have exogenous polyA sequences that  
250 may alter stability of the modified transcript. If known, the endogenous 3' UTR and polyA sequence can be  
251 substituted in the 3' repair donor to recapitulate mRNA stability levels more accurately. By contrast, genes  
252 tagged with 5' insertions, such as *eGFP-rab11a*, will result in transcripts containing the endogenous 3'UTR  
253 that can more closely provide endogenous expression levels. Finally, because our KI approach relies on  
254 splice donor and acceptor elements, our method can be adapted to generate internal insertions at precise

255 codon positions for targets such as membrane proteins containing signal peptide sequences that cannot  
256 be tagged at their C-termini.  
257

## 258 **Materials and methods**

259

### 260 **Zebrafish maintenance**

261 Zebrafish (*Danio rerio*) were used in accordance with Duke University Institutional Animal Care and Use  
262 Committee (IACUC) guidelines and NYU School of Medicine under the approval from protocol number  
263 170105–02. Zebrafish stocks were maintained and bred as previously described (Westerfield, 2007).  
264 Genotypes were determined by PCR and DNA sequencing or phenotypic analysis. Male and female  
265 breeders from 3–18 months of age were used to generate fish for all experiments. 1–7 dpf zebrafish larvae  
266 from the Ekkwill (EK) or AB/TL background were used in this study. Strains generated in this study are:  
267 *TgKI(tjp1a-tdTomato)<sup>pd1224</sup>*, *TgKI(tjp1a-eGFP)<sup>pd1252</sup>*, *TgKI(cldn15la-tdTomato)<sup>pd1249</sup>*, *TgKI(itgb1b-*  
268 *tdTomato)<sup>sk108</sup>*, *TgKI(eGFP-rab11a)<sup>pd1244</sup>*. Embryos and larvae were anesthetized with 0.4 mg/ml MS-222  
269 (Sigma, A5040) dissolved in embryo media for handling when necessary.

270

### 271 **Generation of C-terminal PCR donors**

272 We first generated a series of donor vectors to expedite production of C-terminal knock-in constructs. In  
273 the pUC19 vector backbone, we constructed a multiple cloning site, a fluorescent protein coding sequence  
274 or other tag lacking the start codon (eGFP, mLanYFP, mScarlet, tdTomato, p2A-QF2, p2A-eGFP, p2A-  
275 mScarlet, or p2A-Venus-PEST), a stop codon, a second multiple cloning site, and the zebrafish *ubb* poly-  
276 adenylation sequence. This fragment was flanked by forward and reverse PCR primer sites to generate  
277 PCR donor amplicons for all targets using the same primers, pUC19\_forward 5'-  
278 GCGATTAAGTTGGGTAACGC-3' and pUC19\_reverse 5'- TCCGGCTCGTATGTTGTGTG-3'. A gene  
279 fragment spanning from the middle of the last intron through the last coding sequence codon of the exon  
280 was cloned into the donor vector in frame with the fluorescent protein coding sequence using the following  
281 primers: *tjp1a*-forward 5'- cttgctagcAGTTTCGATGACCACAGGGT-3', *tjp1a*-reverse 5'-  
282 cctctcgcgGAAATGGTCAATAAGCACAGACA-3', *cldn15la*-forward 5'-  
283 ctccgcggGTTTCACGTCAGAAATTGTCCG-3', *cldn15la*-reverse 5'-  
284 ctctcgcgGACGTAGGCTTTGGATGTTTC-3'. PCR donor amplicons were purified using the Nucleospin  
285 Gel and PCR Clean-up kit (Machery-Nagel, distributed by Takara Bio USA). PCR products were not gel  
286 purified. The final product was dried on column at 60°C for 10 minutes and then eluted with water and  
287 stored at -20°C. C-terminal donor vectors will be deposited to Addgene.

288

### 289 **Generation of N-terminal PCR donors for *rab11a***

290 A gene fragment spanning from 446 base pairs upstream from the 5' UTR through 491 base pairs  
291 downstream of the end of exon 1 was cloned into pCS2+ with the following primers: *rab11a*-forward 5'-  
292 ctctcgcgGAACTTACGAGCTGGATTTGTGC-3' and *rab11a*-reverse 5'-  
293 ctttctagaTGACAGCGTCGGTCACAGTT-3'. A small multiple cloning site was added before the start codon  
294 of exon 1 by site directed mutagenesis (Q5 SDM Kit, New England Biolabs) using the primers *rab11a*-  
295 MCS-SDM-forward 5'- tactagtccATGGGGACACGAGACGAC-3' and *rab11a*-MCS-SDM-reverse 5'-  
296 agaccgtaggCTCGATCAAAACAAAAGCGC-3'. eGFP was cloned into the multiple cloning site using the  
297 primers GFP-forward 5'-cttaccggtgccgccaccATGGTGAAGGGCGAGGA-3' and GFP-reverse 5'-  
298 ctactagtCTTGACAGCTCGTCCATGCC-3'. The gRNA target sites used for genomic targeting were  
299 mutated in the donor plasmid using site directed mutagenesis with the primers: gRNA-1-SDM-forward 5'-  
300 aacagcgaactGTGCCTCCACTTTCCTT-3', gRNA-1-SDM-reverse 5'-  
301 atctccgctgtaGCACTGCAGTCTGTCTGT-3', gRNA-2-SDM-forward 5'-  
302 actcgagcagagCAAACAACTCCTGCTCTTC-3', gRNA-2-SDM-reverse 5'-  
303 cgagctagcataTTAGCTGGCCTTTACTGT-3'. PCR donors were generated as described above using the  
304 primers: *rab11a*-donor-forward 5'-GAACTTACGAGCTGGATTTGTGC-3' and *rab11a*-donor-reverse 5'-  
305 ctttctagaTGACAGCGTCGGTCACAGTT-3'. For ssDNA production in Fig. S2, PCR of the same donor  
306 plasmid was performed using the same primers, but the forward primer was phosphorylated. After PCR  
307 ssDNA was generated using the Guide-it Long ssDNA Production System (Takara Bio USA) using the  
308 manufacturer's recommendations. ssDNA was purified using the Nucleospin Gel and PCR Clean-up kit  
309 (Machery-Nagel, distributed by Takara Bio USA) with buffer NTC used as recommended by the

310 manufacturer. ssDNA conversion was verified used gel electrophoresis and the product was stored at -  
311 80°C.

312

### 313 **Generation of N-terminal PCR donors for *prkci***

314 A gene fragment spanning from 488 base pairs upstream from the 5'UTR through 61 base pairs  
315 downstream from exon 1 was cloned into pDONR221 using a BP reaction (ThermoFisher) using the  
316 primers *prkci*-BP-forward 5'-GGGGACAAGTTTGTACAAAAAAGCAGGCTCctatctaggtatatgggccctc-3' and  
317 *prkci*-BP-reverse 5'- GGGGACCACTTTGTACAAGAAAGCTGGGTcgcaatcctgagaataagtgaga-3'. The  
318 gRNA target site in intron 1 was mutated by PCR during initial cloning (the reverse cloning primer was  
319 mutagenic), and the gRNA target site sequence was verified independently in a population of WT fish.  
320 Next a multiple cloning site was inserted before the start codon of exon 1 using the primers *prkci*-MCS-  
321 SDM-forward 5'- tactagttccATGCCACGCTGCGGGAC-3' and *prkci*-MCS-SDM-reverse 5'-  
322 agaccgtaggTATGGACTATCCGTACTCCTGCTAGC-3'. eGFP was cloned to the site using the primers  
323 GFP-forward 5'-cttaccggtgccgccaccATGGTGAGCAAGGGCGAGG-3' and GFP-reverse 5'-  
324 cttactagtCTTGTACAGCTCGTCCATGCC-3'. PCR donors were generated as described above using the  
325 primers *prkci*-forward-donor 5'-tatctaggtatatgggccctc-3' and *prkci*-reverse-donor 5'-  
326 gcaatagtgcaataagtgaga-3'.

327

### 328 **Generation of plasmid donors for *itgb1b***

329 A genomic fragment spanning the last 29 bp of *itgb1b* exon 8 to the end of *itgb1b* exon 9 was cloned into  
330 the pUC19 plasmid (exon numbering is based on transcript ID: ENSDART00000161711.2). A linker  
331 sequence coding for amino acids GGPVAT was inserted after the codon for the last amino acid of *itgb1b*  
332 and the fragment was fused to the tdTomato coding sequence followed by the SV40 polyA signal  
333 sequence. A gRNA target site was designed to target both the donor plasmid, thereby linearizing it in the  
334 intron, and the endogenous genomic intron.

335

### 336 **Production of guide RNA (gRNA)**

337 Guide RNA (gRNA) target sites were identified using CRISPRscan (Moreno-Mateos et al., 2015) and  
338 gRNAs were synthesized by *in vitro* transcription using an oligo-based template method (Yin et al., 2015)  
339 using the MEGAshortscript T7 Transcription Kit (ThermoFisher). gRNAs were precipitated by ammonium  
340 acetate/isopropanol, resuspended in water, and stored at -80°C. For *itgb1b*, crRNA and the tracrRNA were  
341 purchased from IDT, and the crRNA was designed using the Custom Alt-R CRISPR-Cas9 guide RNA  
342 Design Tool (IDT). gRNA target sites used in this study were: *cldn15la*, 5'-  
343 GtTTCACGTCAGAAATTGTCTGGG-3' and 5'-GGATTCTCTAGATTATGACCGG-3'; *prkci*, 5'-  
344 GcATTCTCACTTATTCTCAACGG-3'; *rab11a*, 5'-gGCAGCGGAGAGGACAGCGACGG-3' and 5'-  
345 CCGGCTAGCTCACTTTCGAGCAcC-3'; *tjp1a*, 5'-tGCGAATAGGGGTTGATAATGGG-3' and 5'-  
346 GaGTTTCGATGACCACAGGGTGG-3'; crRNA for *itgb1b*, 5'- GGAGGTCTTGATGTAGGATT-3'.

347

### 348 **Microinjections and visual screening**

349 Early 1-cell stage embryos were injected with 1-2 nL of a knock-in cocktail consisting of gRNA (final  
350 concentration 30-50 pg/nL), dsDNA or ssDNA PCR donors (final concentration 5-10 pg/nL) Cas9 protein  
351 tagged with a nuclear localization sequence (PNA Bio CP-01) (final concentration 300-500 pg/nL), and  
352 phenol red (final concentration 0.05%). We observed mortality rates of 10-20% for dsDNA-injected  
353 embryos and 40-50% for ssDNA-injected embryos. For *itgb1b*, the injection mix containing Cas9-NLS  
354 protein, crRNA, tracrRNA and the plasmid harboring the *itgb1b* targeting cassette was heat-activated at  
355 37°C and injected into one-cell stage wild-type embryos. Embryos were visually screened daily between  
356 1–5 dpf for fluorescence using an Axio Zoom V16 microscope (Zeiss). Embryos suspected of showing  
357 fluorescence were mounted in 0.7% low melting point agarose and imaged by confocal microscopy on a  
358 Leica SP8 microscope using an HC FLUOTAR VISIR 25x/0.95 NA water immersion objective (Leica).  
359 Positive embryos were recovered from anesthesia and raised to adulthood.

360

### 361 **Isolation of stable alleles**



362 Injected embryos showing expression of fluorescently tagged proteins were raised and crossed to WT fish.  
363 The positive F1 embryos were raised and crossed to WT fish. The integration site was sequenced at the  
364 F2 generation and the lines were designated allele numbers. With the exception of Fig. S1-S2, all imaging  
365 data presented are from animals of the F2 or greater generation  
366

### 367 **Imaging and image processing**

368 All imaging was performed on a Leica SP8 confocal microscope. Live imaging was conducted with a  
369 FLUOTAR VISIR 25x/0.95 NA or HC PL APO CS2 20x/0.75 water immersion objectives (Leica), and cross  
370 sections with an HC PL APO CS2 63x/1.40 oil immersion objective (Leica). Whole animals were imaged in  
371 tiling mode and the data were stitched in Leica LAS software. Imaging data were processed in ImageJ/FIJI  
372 (NIH) to prepare 3D reconstructions using native plugins. To enhance visualization of some images, data  
373 were pseudo-colored using default lookup tables (LUTs) in ImageJ/FIJI. LUT scales are presented in the  
374 figure panels. Post-processing for linear changes in brightness were performed in photoshop using the  
375 levels tool.  
376

### 377 **Single particle imaging**

378 6 dpf GFP-negative larvae were fixed in 4% paraformaldehyde in PBS pH 7.5 overnight at 4°C, rinsed in  
379 PBS, and then embedded in 5% low melting point agarose. 200 µm sections were collected using a Leica  
380 VT1000S vibratome (Levic et al., 2020). Sections were incubated with 340 ng/mL purified eGFP, which  
381 was generated as we previously described (Park et al., 2019), overnight at 4°C. The solution was then  
382 gently aspirated and then sections were fixed in 4% paraformaldehyde in PBS pH 7.5 for 30 minutes at  
383 room temperature. Sections were rinsed in PBS and then mounted on glass slides in 90% glycerol  
384 buffered with 10 mM Tris, pH 8 with 1% N propyl-gallate added. Sections were imaged near the coverslip  
385 surface with a Leica SP8 confocal microscope using an HC PL APO CS2 63x/1.40 oil immersion objective.  
386 Excitation was performed with a 20 mW 488 nm laser operating at 0.2% power, and scans were  
387 performed at 400 Hz with a pixel size of 50 nm. Emission spectra were collected from 498-550 nm using a  
388 HyD detector operating in photon counting mode with 10x line accumulation and at 10% gain.  
389 Experimental samples (eGFP-Rab11a larvae) were processed identically. Raw 12-bit images were  
390 analyzed in ImageJ/FIJI. Photon counts of 5 pixel<sup>2</sup> ROIs of eGFP particles were collected and analyzed by  
391 linear regression using Graphpad Prism. Photon counts experimental samples were interpolated from the  
392 linear regression analysis of purified eGFP particles to infer the number of eGFP molecules per vesicle.  
393

394 **Acknowledgements**

395

396 We thank the Duke Zebrafish Core and Joseph Proietti and Sam Pirani for excellent fish care and  
397 maintenance and Jieun Esther Park for providing purified eGFP. We also thank Xiaolei Wang, Ian Macara,  
398 and Kristen Kwan for helpful discussions. The use of the NYULH DART Microscopy Laboratory  
399 (P30CA016087) is gratefully acknowledged.

400

401

402 **Competing interests**

403

404 The authors declare no competing interests, financial or otherwise.

405

406

407 **Author contributions**

408

409 D.S.L. developed the methodology for N-terminal endogenous tagging and C-terminal endogenous  
410 tagging, generated the *cldn15la*, *tjp1a*, and *rab11a* zebrafish lines, and collected imaging data. N.Y.  
411 developed the methodology for C-terminal tagging using a plasmid as a repair donor, generated the *itgb1b*  
412 zebrafish line, and collected imaging data. S.W. collected imaging data. D.S.L. wrote the manuscript with  
413 input from all authors. M.B. and H.K. supervised the project.

414

415

416 **Funding**

417

418 This work was supported by NIH grants DK121007 and DK113123 (to M.B.), and NS102322 (to H.K.).  
419 D.S.L. was supported by Duke Training Grant in Digestive Diseases and Nutrition Grant T32DK007568-26.  
420 N.Y. was supported by a NYSTEM institutional training grant C322560GG and by an American Heart  
421 Association fellowship 20PRE35180164. M.B. is an HHMI Faculty Scholar.

422

423 **Data availability**

424

425 C-terminal knock-in donor vectors will be deposited to Addgene and stable knock-in zebrafish lines to  
426 ZIRC, but in the interim they are available from our labs upon request to the corresponding author. A  
427 detailed protocol of our endogenous tagging method is provided as a supplementary file. Sequence files  
428 describing the genomic integration sites for all KI alleles are provided as supplementary files.

429

430

## References

- AHMED, S. M., NISHIDA-FUKUDA, H., LI, Y., MCDONALD, W. H., GRADINARU, C. C. & MACARA, I. G. 2018. Exocyst dynamics during vesicle tethering and fusion. *Nature Communications*, 9, 5140.
- ALVERS, A. L., RYAN, S., SCHERZ, P. J., HUISKEN, J. & BAGNAT, M. 2014. Single continuous lumen formation in the zebrafish gut is mediated by smoothed-dependent tissue remodeling. *Development*, 141, 1110-9.
- BUSSMANN, J. & SCHULTE-MERKER, S. 2011. Rapid BAC selection for tol2-mediated transgenesis in zebrafish. *Development*, 138, 4327-4332.
- CHANDLER, K. J., CHANDLER, R. L., BROECKELMANN, E. M., HOU, Y., SOUTHARD-SMITH, E. M. & MORTLOCK, D. P. 2007. Relevance of BAC transgene copy number in mice: transgene copy number variation across multiple transgenic lines and correlations with transgene integrity and expression. *Mammalian Genome*, 18, 693-708.
- CLAYTON, A. H. 2018. Fluorescence-based approaches for monitoring membrane receptor oligomerization. *J Biosci*, 43, 463-469.
- CRONAN, M. R. & TOBIN, D. M. 2019. Endogenous Tagging at the *cdh1* Locus for Live Visualization of E-Cadherin Dynamics. *Zebrafish*, 16, 324-325.
- DANIEL, K., ICHA, J., HORENBURG, C., MÜLLER, D., NORDEN, C. & MANSFELD, J. 2018. Conditional control of fluorescent protein degradation by an auxin-dependent nanobody. *Nature Communications*, 9.
- DEWARI, P. S., SOUTHGATE, B., MCCARTEN, K., MONOGAROV, G., O'DUIBHIR, E., QUINN, N., TYRER, A., LEITNER, M.-C., PLUMB, C., KALANTZAKI, M., BLIN, C., FINCH, R., BRESSAN, R. B., MORRISON, G., JACOBI, A. M., BEHLKE, M. A., VON KRIEGSHEIM, A., TOMLINSON, S., KRIJGSVELD, J. & POLLARD, S. M. 2018. An efficient and scalable pipeline for epitope tagging in mammalian stem cells using Cas9 ribonucleoprotein. *eLife*, 7.
- DICKINSON, D. J., PANI, A. M., HEPPELT, J. K., HIGGINS, C. D. & GOLDSTEIN, B. 2015. Streamlined Genome Engineering with a Self-Excising Drug Selection Cassette. *Genetics*, 200, 1035-1049.
- ESCAMILLA-AYALA, A. A., SANNERUD, R., MONDIN, M., POERSCH, K., VERMEIRE, W., PAPARELLI, L., BERLAGE, C., KOENIG, M., CHAVEZ-GUTIERREZ, L., ULBRICH, M. H., MUNCK, S., MIZUNO, H. & ANNAERT, W. 2020. Super-resolution microscopy reveals majorly mono- and dimeric presenilin1/gamma-secretase at the cell surface. *Elife*, 9.
- FUENTES, F., REYNOLDS, E., LEWELLIS, S. W., VENKITESWARAN, G. & KNAUT, H. 2016. A Plasmid Set for Efficient Bacterial Artificial Chromosome (BAC) Transgenesis in Zebrafish. *G3 Genes/Genomes/Genetics*, 6, 829-834.
- GAO, Y., HISEY, E., BRADSHAW, T. W. A., ERATA, E., BROWN, W. E., COURTLAND, J. L., UEZU, A., XIANG, Y., DIAO, Y. & SODERLING, S. H. 2019. Plug-and-Play Protein Modification Using Homology-Independent Universal Genome Engineering. *Neuron*, 103, 583-597.e8.
- GIBSON, T. J., SEILER, M. & VEITIA, R. A. 2013. The transience of transient overexpression. *Nature Methods*, 10, 715-721.
- HOSHIJIMA, K., JURYNEC, M. J. & GRUNWALD, D. J. 2016. Precise Editing of the Zebrafish Genome Made Simple and Efficient. *Dev Cell*, 36, 654-67.
- HOWE, D. G., RAMACHANDRAN, S., BRADFORD, Y. M., FASHENA, D., TORO, S., EAGLE, A., FRAZER, K., KALITA, P., MANI, P., MARTIN, R., MOXON, S. T., PADDOCK, H., PICH, C., RUZICKA, L., SCHAPER, K., SHAO, X., SINGER, A., VAN SLYKE, C. E. & WESTERFIELD, M. 2021. The Zebrafish Information Network: major gene page and home page updates. *Nucleic Acids Res*, 49, D1058-d1064.
- JÜLICH, D., GEISLER, R. & HOLLEY, S. A. 2005. Integrin $\alpha$ 5 and Delta/Notch Signaling Have Complementary Spatiotemporal Requirements during Zebrafish Somitogenesis. *Developmental Cell*, 8, 575-586.
- KIMURA, Y., HISANO, Y., KAWAHARA, A. & HIGASHIJIMA, S. 2014. Efficient generation of knock-in transgenic zebrafish carrying reporter/driver genes by CRISPR/Cas9-mediated genome engineering. *Sci Rep*, 4, 6545.
- KOLES, K., YEH, A. R. & RODAL, A. A. 2016. Tissue-specific tagging of endogenous loci in *Drosophila melanogaster*. *Biology Open*, 5, 83-89.
- KWAN, K. M., FUJIMOTO, E., GRABHER, C., MANGUM, B. D., HARDY, M. E., CAMPBELL, D. S., PARANT, J. M., YOST, H. J., KANKI, J. P. & CHIEN, C.-B. 2007. The Tol2kit: A multisite gateway-

- based construction kit for Tol2 transposon transgenesis constructs. *Developmental Dynamics*, 236, 3088-3099.
- LEVIC, D. S., RYAN, S., MARJORAM, L., HONEYCUTT, J., BAGWELL, J. & BAGNAT, M. 2020. Distinct roles for luminal acidification in apical protein sorting and trafficking in zebrafish. *J Cell Biol*, 219.
- LI, W., ZHANG, Y., HAN, B., LI, L., LI, M., LU, X., CHEN, C., LU, M., ZHANG, Y., JIA, X., ZHU, Z., TONG, X. & ZHANG, B. 2019. One-step efficient generation of dual-function conditional knockout and geno-tagging alleles in zebrafish. *eLife*, 8.
- MARQUES, P. E., NYEGAARD, S., COLLINS, R. F., TROISE, F., FREEMAN, S. A., TRIMBLE, W. S. & GRINSTEIN, S. 2019. Multimerization and Retention of the Scavenger Receptor SR-B1 in the Plasma Membrane. *Dev Cell*, 50, 283-295 e5.
- MARTINEZ-MORALES, J. R., REMBOLD, M., GREGER, K., SIMPSON, J. C., BROWN, K. E., QUIRING, R., PEPPERKOK, R., MARTIN-BERMUDO, M. D., HIMMELBAUER, H. & WITTBRODT, J. 2009. ojoplano-mediated basal constriction is essential for optic cup morphogenesis. *Development*, 136, 2165-2175.
- MORENO-MATEOS, M. A., VEJNAR, C. E., BEAUDOIN, J.-D., FERNANDEZ, J. P., MIS, E. K., KHOKHA, M. K. & GIRALDEZ, A. J. 2015. CRISPRscan: designing highly efficient sgRNAs for CRISPR-Cas9 targeting in vivo. *Nature Methods*, 12, 982-988.
- NAVIS, A., MARJORAM, L. & BAGNAT, M. 2013. Cftr controls lumen expansion and function of Kupffer's vesicle in zebrafish. *Development*, 140, 1703-1712.
- PARK, J., LEVIC, D. S., SUMIGRAY, K. D., BAGWELL, J., EROGLU, O., BLOCK, C. L., EROGLU, C., BARRY, R., LICKWAR, C. R., RAWLS, J. F., WATTS, S. A., LECHLER, T. & BAGNAT, M. 2019. Lysosome-Rich Enterocytes Mediate Protein Absorption in the Vertebrate Gut. *Dev Cell*, 51, 7-20 e6.
- PENG, Y., CLARK, K. J., CAMPBELL, J. M., PANETTA, M. R., GUO, Y. & EKKER, S. C. 2014. Making designer mutants in model organisms. *Development*, 141, 4042-4054.
- RANAWAKAGE, D. C., OKADA, K., SUGIO, K., KAWAGUCHI, Y., KUNINOBU-BONKOHARA, Y., TAKADA, T. & KAMACHI, Y. 2021. Efficient CRISPR-Cas9-Mediated Knock-In of Composite Tags in Zebrafish Using Long ssDNA as a Donor. *Frontiers in Cell and Developmental Biology*, 8.
- RODRIGUEZ-FRATICELLI, A. E., BAGWELL, J., BOSCH-FORTEA, M., BONCOMPAIN, G., REGLERO-REAL, N., GARCIA-LEON, M. J., ANDRES, G., TORIBIO, M. L., ALONSO, M. A., MILLAN, J., PEREZ, F., BAGNAT, M. & MARTIN-BELMONTE, F. 2015. Developmental regulation of apical endocytosis controls epithelial patterning in vertebrate tubular organs. *Nat Cell Biol*, 17, 241-50.
- SEREBRENK, Y. V., SANBURY, S. E., KUMAR, S. S., HENAO-MEJIA, J. & SHALEM, O. 2019. Efficient and flexible tagging of endogenous genes by homology-independent intron targeting. *Genome Research*, 29, 1322-1328.
- SIDHAYE, J. & NORDEN, C. 2017. Concerted action of neuroepithelial basal shrinkage and active epithelial migration ensures efficient optic cup morphogenesis. *eLife*, 6.
- WANG, J., YIN, Y., LAU, S., SANKARAN, J., ROTHENBERG, E., WOHLAND, T., MEIER-SHELLERSHEIM, M. & KNAUT, H. 2018. Anosmin1 Shuttles Fgf to Facilitate Its Diffusion, Increase Its Local Concentration, and Induce Sensory Organs. *Dev Cell*, 46, 751-766.e12.
- WESTERFIELD, M. 2007. *THE ZEBRAFISH BOOK, 5th Edition; A guide for the laboratory use of zebrafish (Danio rerio)*, University of Oregon Press.
- WIERSON, W. A., WELKER, J. M., ALMEIDA, M. P., MANN, C. M., WEBSTER, D. A., TORRIE, M. E., WEISS, T. J., KAMBAKAM, S., VOLLBRECHT, M. K., LAN, M., MCKEIGHAN, K. C., LEVEY, J., MING, Z., WEHMEIER, A., MIKELSON, C. S., HALTOM, J. A., KWAN, K. M., CHIEN, C.-B., BALCIUNAS, D., EKKER, S. C., CLARK, K. J., WEBBER, B. R., MORIARITY, B. S., SOLIN, S. L., CARLSON, D. F., DOBBS, D. L., MCGRAIL, M. & ESSNER, J. 2020. Efficient targeted integration directed by short homology in zebrafish and mammalian cells. *eLife*, 9, e53968.
- YAMAGUCHI, N., COLAK-CHAMPOLLION, T. & KNAUT, H. 2019. zGrad is a nanobody-based degron system that inactivates proteins in zebrafish. *eLife*, 8.
- YIN, L., JAO, L.-E. & CHEN, W. 2015. *Generation of Targeted Mutations in Zebrafish Using the CRISPR/Cas System*. Springer New York.
- ZHONG, H., CEBALLOS, C. C., MASSENGILL, C. I., MUNIAK, M. A., MA, L., QIN, M., PETRIE, S. K. & MAO, T. 2021. High-fidelity, efficient, and reversible labeling of endogenous proteins using CRISPR-based designer exon insertion. *eLife*, 10.



ZIHNI, C., MILLS, C., MATTER, K. & BALDA, M. S. 2016. Tight junctions: from simple barriers to multifunctional molecular gates. *Nature Reviews Molecular Cell Biology*, 17, 564-580.

431

Figure 1

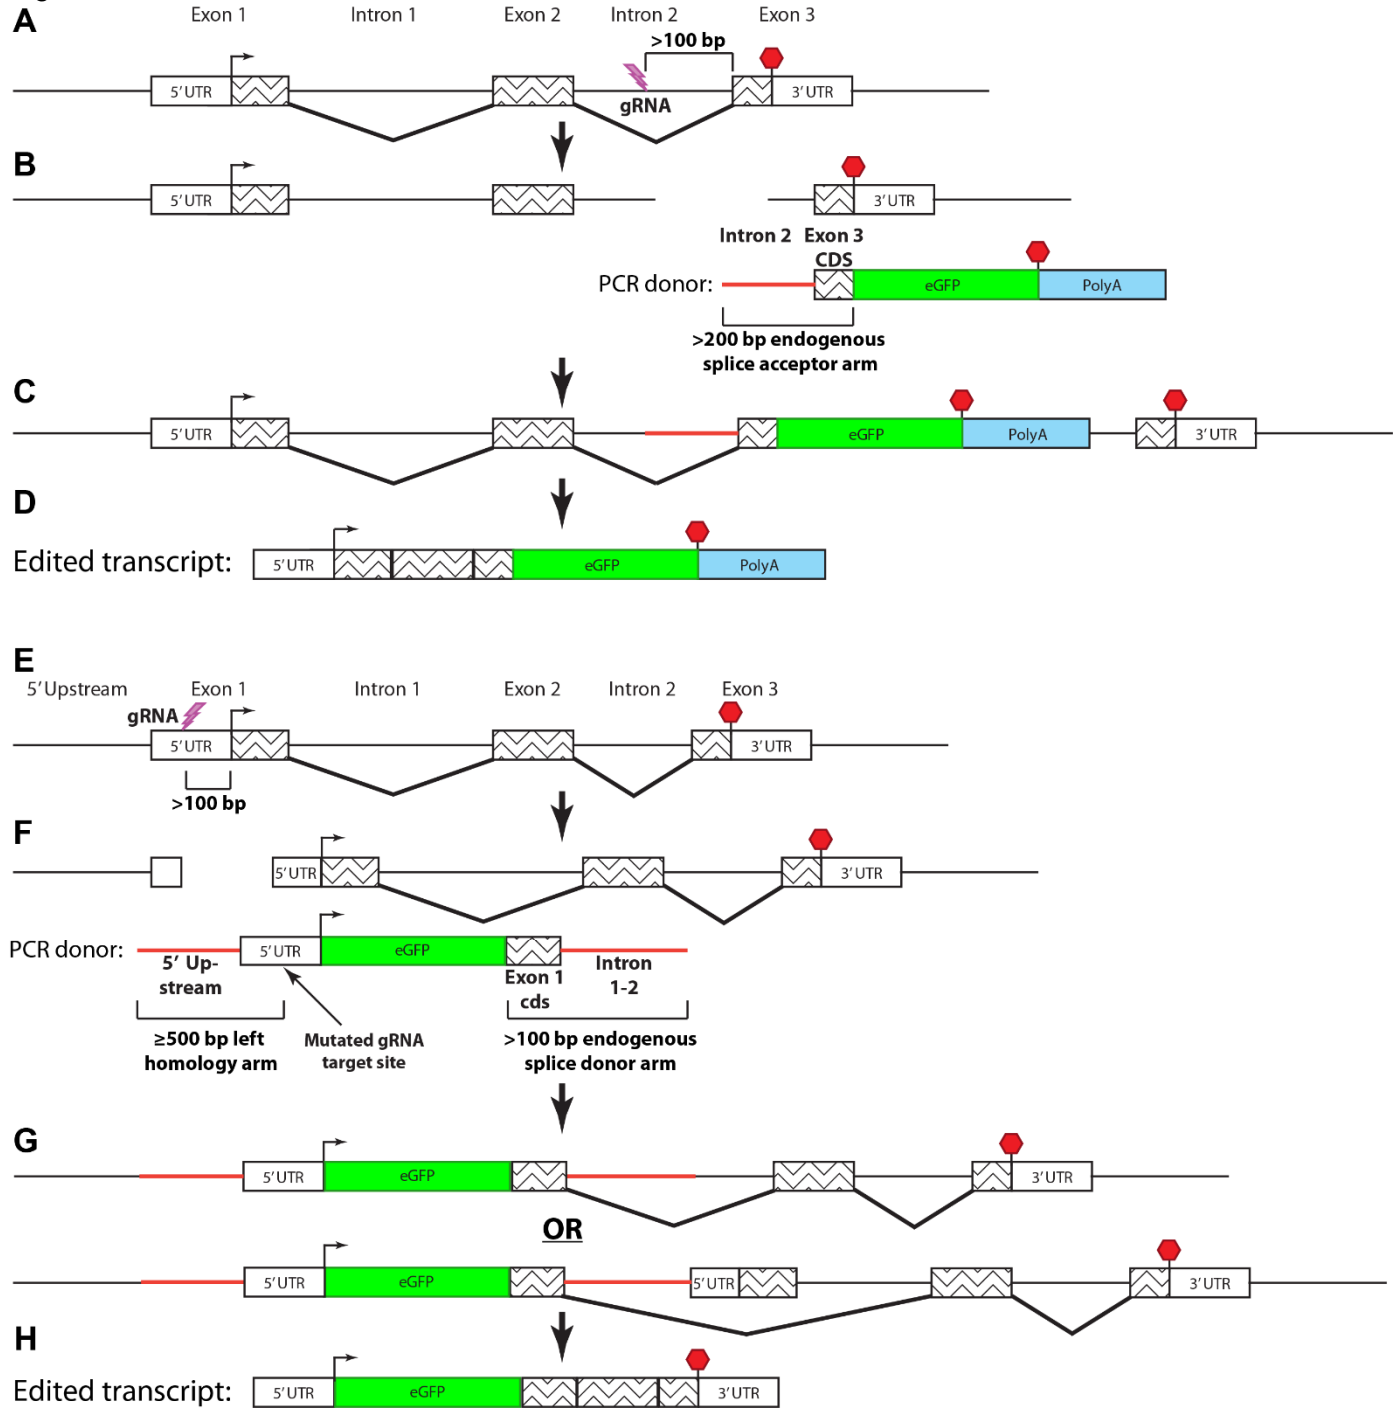

432

433

434

435

436

437

438

439

440

441

442

443

444

445

Figure 1. **Knock-in fusion gene tagging in zebrafish using splice donor and acceptor arms. (A-D)** C-terminal endogenous tagging strategy. **(A)** An intron upstream from the exon encoding the stop codon is targeted by CRISPR. **(B)** A dsDNA PCR donor containing a 5' splice acceptor element (~200 bp of intron sequence), last exon coding sequence fused to a fluorescent protein coding sequence, and polyadenylation sequence is co-injected. **(C-D)** Expression of the tagged transcript can tolerate error-prone integration of the PCR donor into the intron as it depends on mRNA splicing rather than precise genomic editing. **(E-H)** N-terminal endogenous tagging strategy. **(E)** A non-coding region upstream from the start codon is targeted by CRISPR. **(F)** A dsDNA containing a 5' homology arm (~500 bp of sequence upstream from the gRNA target site), 5' UTR with a mutated gRNA target site, fluorescent protein coding sequence, first exon coding sequence, and 3' splice donor element (~100 bp of intron sequence) is co-injected. **(G-H)** Expression of the tagged protein occurs either if the 3' end of the PCR donor is integrated by HDR (G, upper) or NHEJ (G, lower) because the endogenous first exon does not contain a splice acceptor site.

446 Figure 2

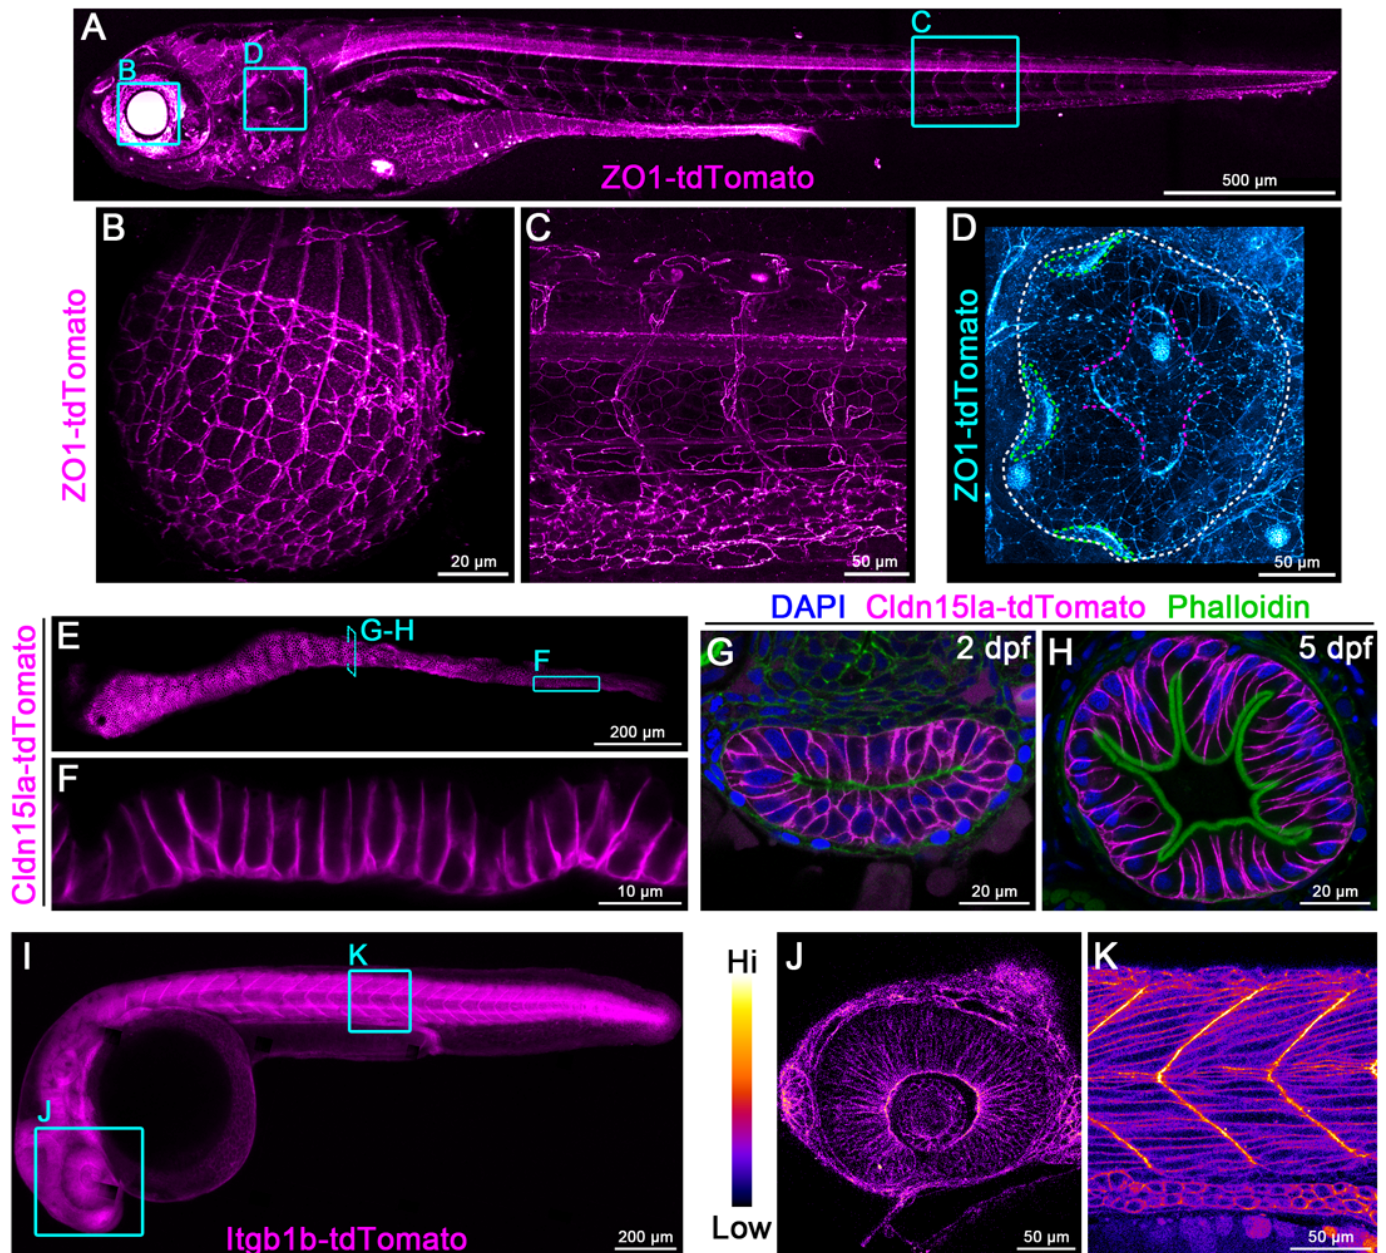

447  
 448 Figure 2. Endogenous C-terminal tagging of *ZO1* (*tjp1a*) and *Cldn15la* (*cldn15la*). (A-D) Live imaging  
 449 3d reconstructions of *TgKl(tjp1a-tdTomato)<sup>pd1224</sup>* heterozygous larvae. Cyan boxes in panel A show  
 450 representative ROIs for panels B-D. For panel D: White dotted line, otic capsule; green dotted lines,  
 451 cristae; magenta dotted lines, canals and septum. Panels A-C are pseudo-colored with the ImageJ/FIJI  
 452 Magenta Hot LUT. Panel D is pseudo-colored with the ImageJ/FIJI Cyan Hot LUT. Animals are 7 dpf (A),  
 453 5 dpf (B), and 3 dpf (C-D). Scale bars are 500  $\mu$ m (A), 20  $\mu$ m (B), and 50  $\mu$ m (C-D). (E-F) Live imaging of  
 454 the intestine of a 7 dpf *TgKl(cldn15la-tdTomato)<sup>pd1249</sup>* heterozygous larva. Panel E is pseudo-colored with  
 455 the ImageJ/FIJI Magenta Hot LUT. Scale bars are 200  $\mu$ m (E) and 10  $\mu$ m (F). (G-H) Transverse sections  
 456 of the mid-intestine at the stages of lumen opening (2 dpf) (G) and onset of larval feeding (5 dpf) (H).  
 457 Scale bars are 20  $\mu$ m. (I-K) Live imaging of a 28 hpf *TgKl(itgb1b-tdTomato)<sup>sk108</sup>* heterozygous embryo.  
 458 Cyan boxes in Panel I are representative ROIs for panels J-K, which are pseudo-colored according to the  
 459 LUT scale shown. Scale bars are 200  $\mu$ m (I) and 50  $\mu$ m (J-K).

460  
 461  
 462  
 463  
 464



465 Figure 3

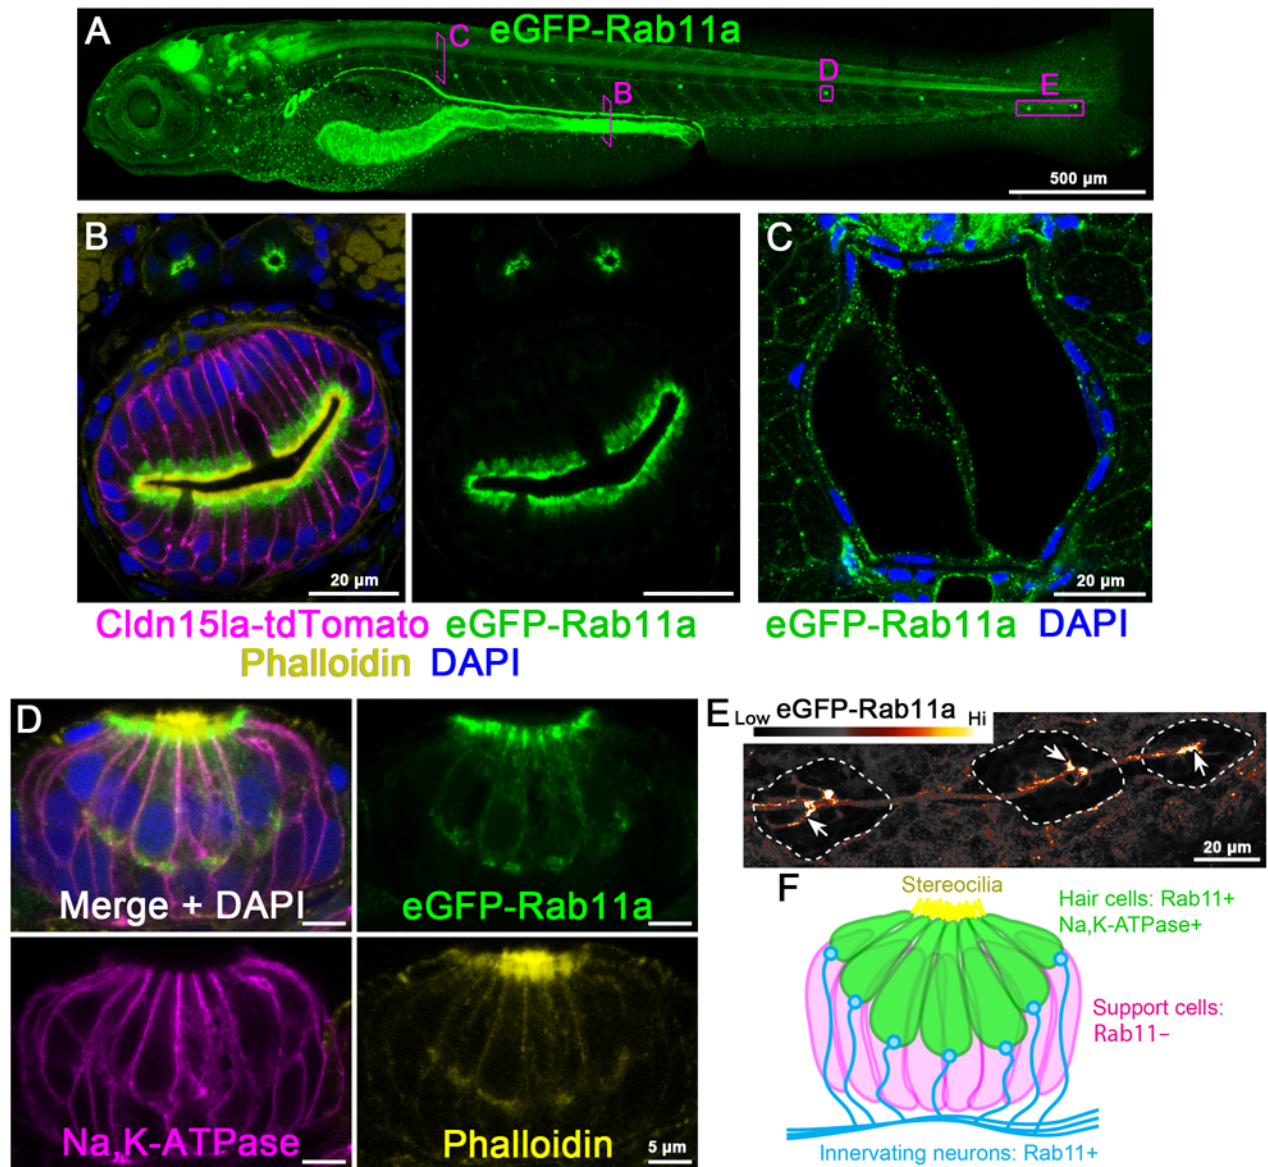

466  
467 **Figure 3. Endogenous N-terminal tagging of Rab11a (*rab11a*).** (A) Live imaging 3d reconstruction of 5  
468 dpf *TgKI(eGFP-rab11a)<sup>pd1244</sup>* heterozygous larva. Magenta boxes show representative ROIs for panels B-  
469 E. Scale bars is 500  $\mu\text{m}$ . (B) Transverse section through the posterior mid-intestine (LREs) and pronephric  
470 ducts. Scale bars are 20  $\mu\text{m}$ . (C) Transverse section through the notochord. Scale bars is 20  $\mu\text{m}$ . (D)  
471 Whole mount image of a neuromast. Scale bars are 5  $\mu\text{m}$ . (E) Live lateral image of neurons innervating  
472 the terminal lateral line neuromasts (outlined by dotted line). Image is pseudo-colored according to the  
473 LUT scale shown. Scale bars is 20  $\mu\text{m}$ . (F) Schematic summarizing expression and localization of Rab11a  
474 within neuromasts.

475  
476  
477  
478  
479  
480  
481  
482  
483  
484  
485



486 Figure 4

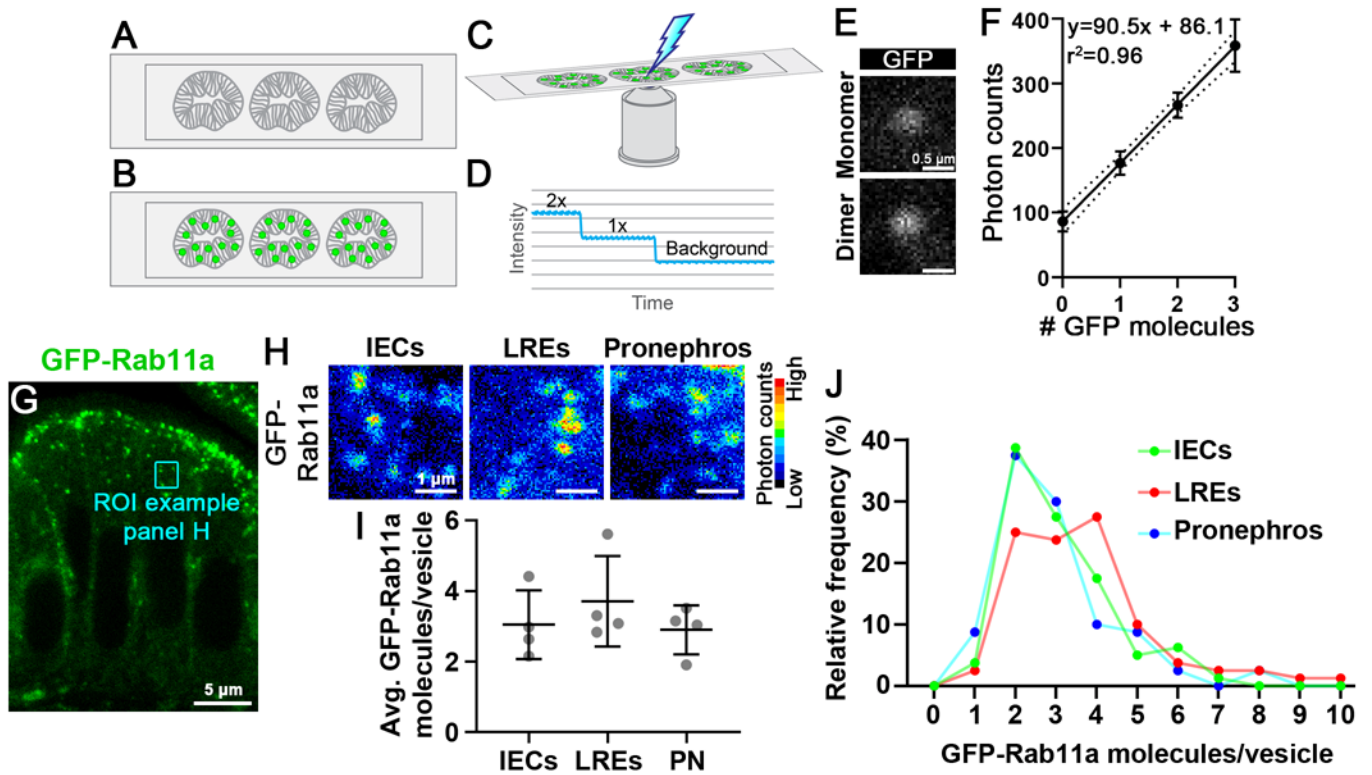

487

488

489

490

491

492

493

494

495

496

497

498

499

500

501

502

503

504

505

Figure 4. **Tissue-specific Rab11a expression levels do not strongly affect its concentration on apical vesicles of the intestine or pronephros.** (A-D) Schematic outlining single particle imaging to measure photon emission of purified GFP on zebrafish tissue. Intestinal sections of GFP-negative larvae are collected (A) and GFP solution (340 ng/mL) is incubated with and crosslinked onto the tissue surface (B). Photon counts of GFP particles are collected and the particles are photobleached to background-level intensity (C). The number of GFP molecules per particle are inferred by the decay profile. (E-F) Single particle photon count imaging (E) and linear regression analysis of purified GFP photon emission when imaged on intestinal tissue sections. Scale bars are 0.5  $\mu$ m. (G) Transverse section of mid-intestine enterocytes of a *TgKI(eGFP-rab11a)<sup>pd1244</sup>* heterozygous larva. Cyan box shows a representative ROI of a group of apical vesicles used for single particle imaging. (H) Pseudo-colored photon count images of apical vesicles of mid-intestine enterocytes (IECs), posterior mid-intestine lysosome-rich enterocytes (LREs), and pronephric duct epithelial cells (PN). Photon count intensity LUT scale is shown on the right. Scale bars are 1  $\mu$ m. (I) Plot of average GFP-Rab11a concentration values from apical vesicles. Data points are average values from tissue sections of individual larvae. n=4 larvae for each organ (20 vesicles per animal). Data were not significantly different (One-way ANOVA). (J) Relative frequency plot of the data used for panel I. LREs vs. IECs,  $p<0.05$ ; LREs vs. PN,  $p<0.01$ ; IECs vs. PN, not significant (One-way ANOVA). n=80 vesicles per organ.

506 Figure S1

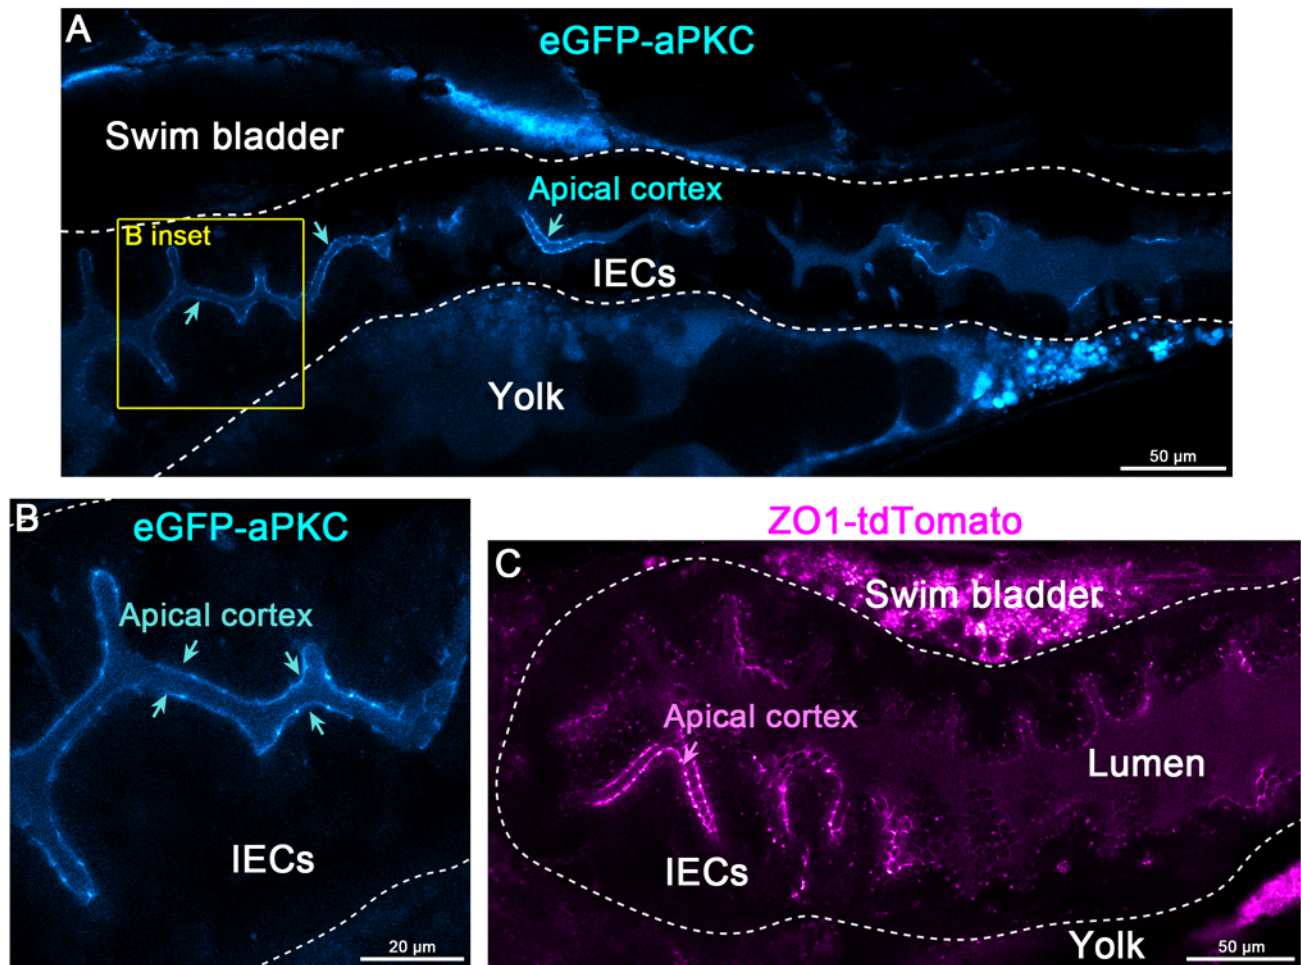

507

508

509

510

511

512

513

514

Figure S1. **Examples of mosaicism in injected embryos (F0s).** (A-B) Live imaging of a 5 dpf eGFP-aPKC (encoded by *prkci/has*) F0 larva. Cyan arrows point to the apical cortex. Panels A-B are pseudo-colored with the ImageJ/FIJI Cyan Hot LUT. Scale bars are 50 µm (A) and 20 µm (B). (C) Live imaging of a 5 dpf ZO1-tdTomato (encoded by *tjp1a*) F0 larva. Panel C is pseudo-colored with the ImageJ/FIJI Magenta Hot LUT. Magenta arrow points to apical the cortex. Scale bars is 50 µm. The dotted line marks the intestinal epithelium.

### eGFP-rab11a F0 at 5 dpf

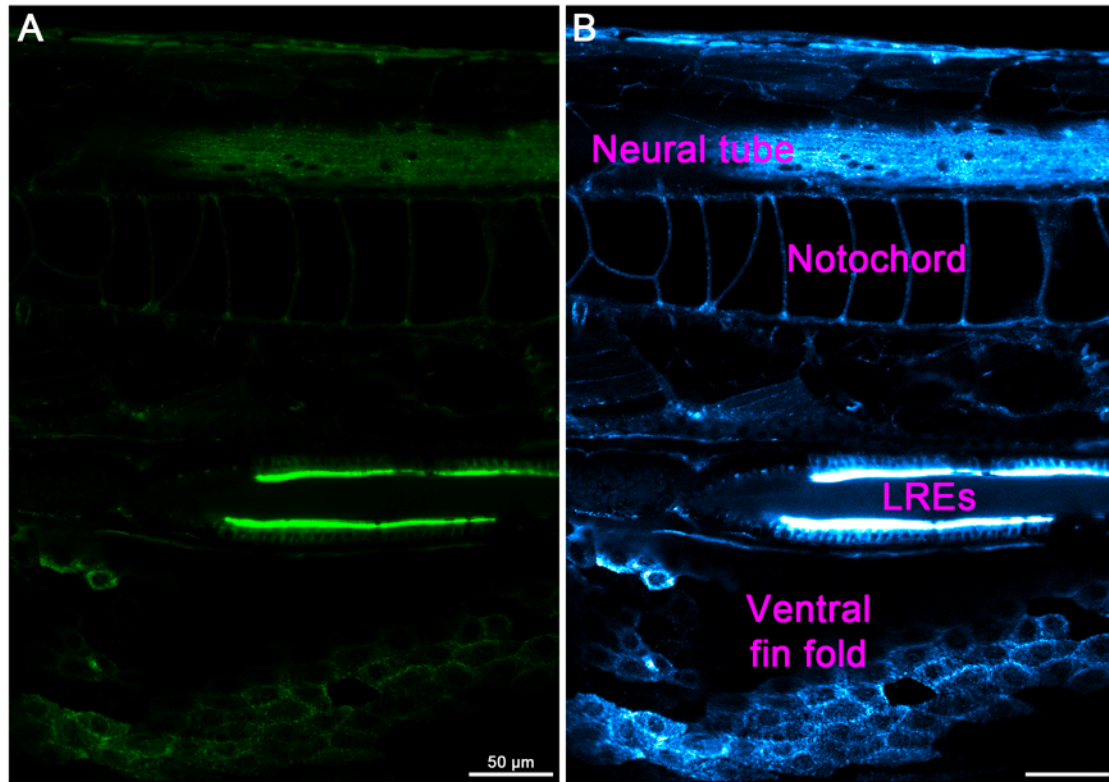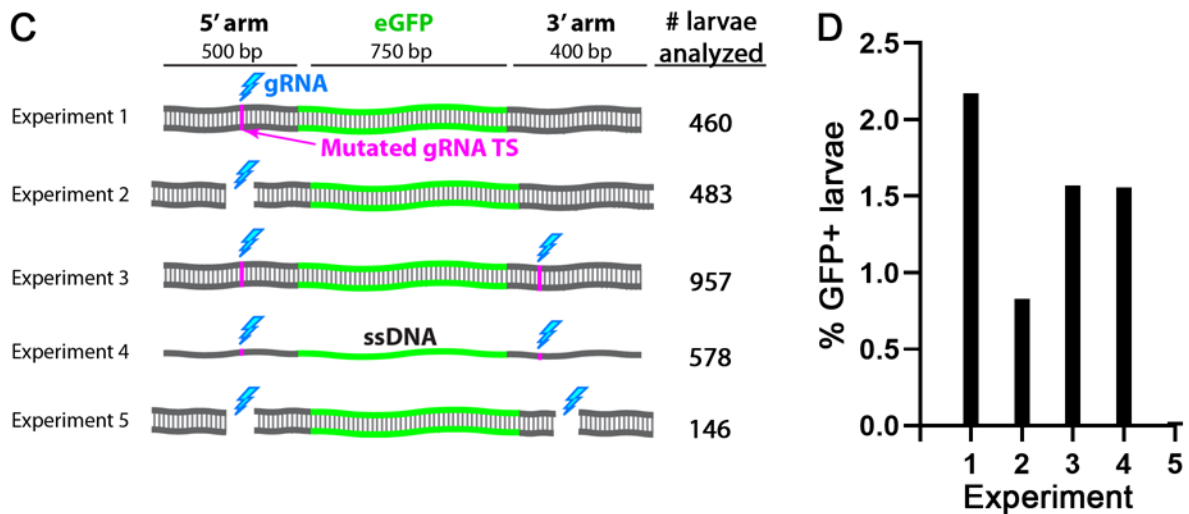

516

517

518 Figure S2. **Variables affecting F0 efficiency for N-terminal endogenous tagging.** (A-B) Representative

519 examples of mosaic expression of eGFP-Rab11a in injected larvae (F0s). The broad spatial expression

520 patterns and high expression levels of eGFP-Rab11a allow for simple visual screening to test PCR donor

521 variables to optimize endogenous tagging. Panel A is original confocal live image, and panel B is pseudo-

522 colored with the ImageJ/FIJI Cyan Hot LUT to enhance visualization of lower expressing cell-types. Scale

523 bars are 50 μm. (C) 1-cell stage embryos were injected with a knock-in cocktail containing Cas9 protein,

524 while the PCR donor and gRNAs varied. The cyan bolt indicates the relative position of the gRNA

525 (upstream or downstream from the insertion site or both). The magenta line indicates when the PAM site

526 for the gRNA was mutated on the PCR donor. For experiment 4, linear single-stranded DNA (ssDNA) was

527 used rather than dsDNA PCR donors. The numbers to the right indicate the total number of surviving

528 larvae that were visually screened for fluorescence. (D) Plot of F0 expression efficiency rates for the

529 experiments in panel C.

529

530 Figure S3

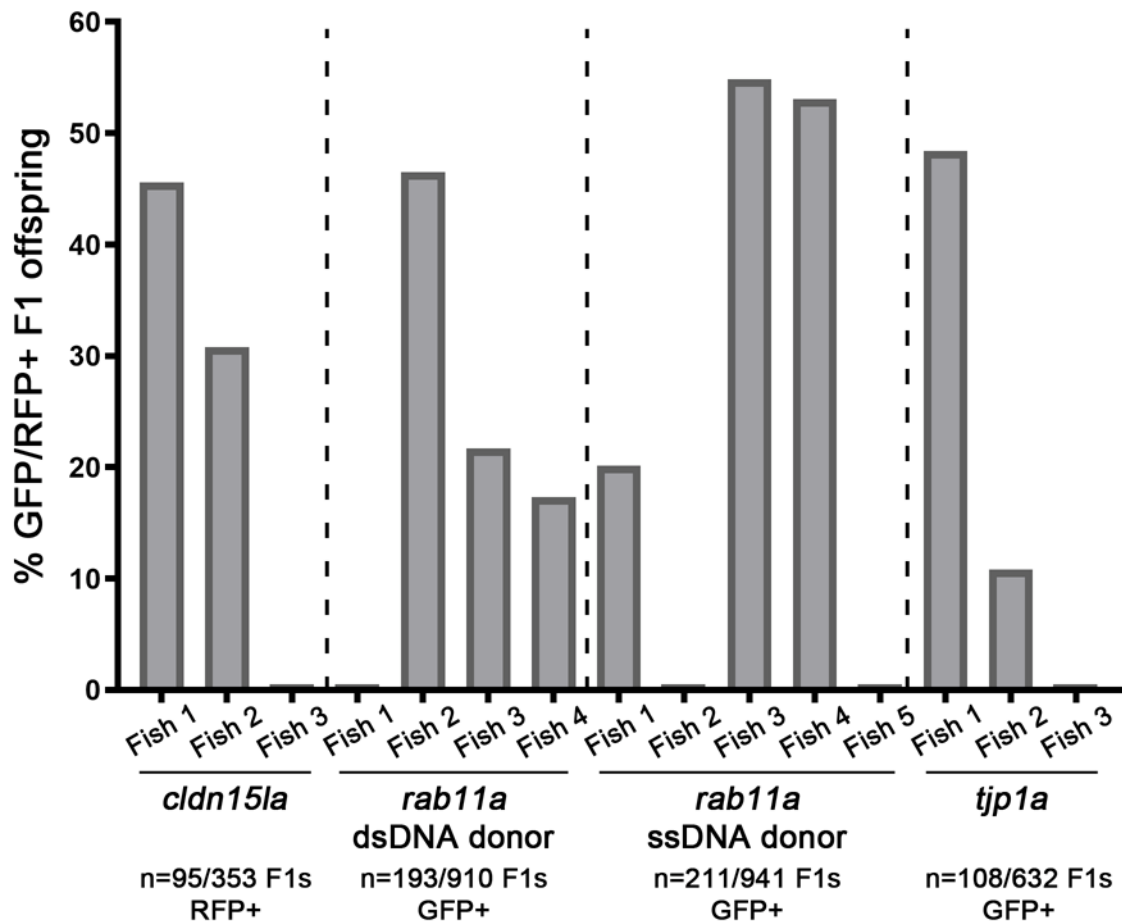

531  
532  
533  
534  
535  
536  
537  
538  
539

Figure S3. **Germline transmission efficiency rates following visual screening of injected larvae.** 1-cell stage embryos were injected with knock-in cocktails for different genes and then visually screened for fluorescence. The larvae showing expression were raised to maturity and then outcrossed. 3-5 animals were outcrossed per condition, and the F1 progeny were visually screened for fluorescence. The germ lines of F0 adults have mosaic integration, so the knock-in alleles do not show Mendelian segregation in the F1 embryos. The data plotted indicates the levels of mosaicism present in the F0 generation.



540 Figure S4

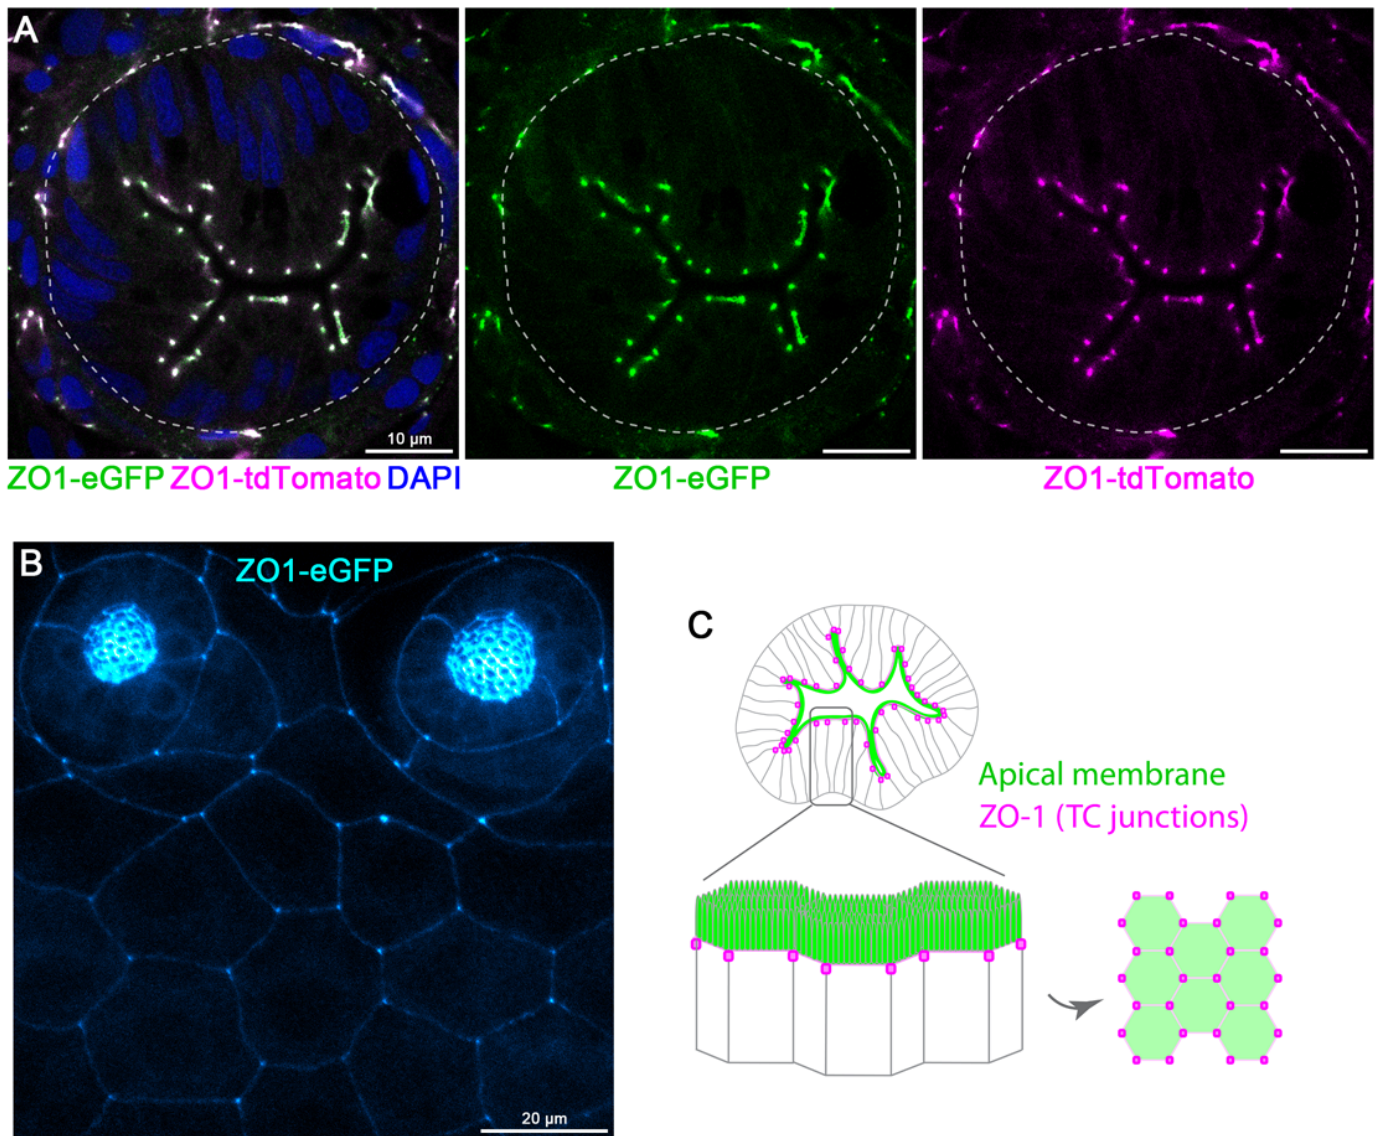

541  
542 Figure S4. **Colocalization of compound heterozygous tagged ZO1 (*tjp1a*) alleles and localization to**  
543 **tricellular junctions. (A)** Transverse sections of a *TgKI(tjp1a-eGFP)<sup>pd1252</sup>;TgKI(tjp1a-tdTomato)<sup>pd1224</sup>*  
544 compound heterozygous larva at 5 dpf. Scale bars are 10  $\mu$ m. **(B)** Live imaging of the epidermis of a 5 dpf  
545 *TgKI(tjp1a-eGFP)<sup>pd1252</sup>* larva. Panel B is pseudo-colored with the ImageJ/FIJI Cyan Hot LUT. Scale bars is  
546 20  $\mu$ m. **(C)** Schematic illustrating the enriched localization of endogenously tagged ZO1 to tricellular (TC)  
547 junctions.  
548

- 549 **Movie 1. Rotating 3D reconstruction of ZO1-tdTomato expression in the lens.** Data are from Fig. 2B.  
550
- 551 **Movie 2. Rotating 3D reconstruction of ZO1-tdTomato expression in the embryonic trunk.** Data are  
552 from Fig. 2C.  
553
- 554 **Movie 3. Rotating 3D reconstruction of ZO1-tdTomato expression in the otic capsule.** Data are from  
555 Fig. 2D.  
556
- 557 **Movie 4. Rotating 3D reconstruction eGFP-Rab11a expression in 5 dpf whole larvae.** Data are from  
558 Fig. 3A.  
559
- 560 **Movie 5. Live imaging of eGFP-Rab11a vesicle dynamics in notochord vacuole cells.** Data are  
561 related to Fig. 3C. Data were acquired at 1 frame every 3 seconds.  
562
- 563 Supplementary file 1. Sequence file for the genomic integration site of *TgKI(tjp1a-tdTomato)<sup>pd1224</sup>*.  
564
- 565 Supplementary file 2. Sequence file for the genomic integration site of *TgKI(tjp1a-eGFP)<sup>pd1252</sup>*.  
566
- 567 Supplementary file 3. Sequence file for the genomic integration site of *TgKI(cldn15la-tdTomato)<sup>pd1249</sup>*.  
568
- 569 Supplementary file 4. Sequence file for the genomic integration site of *TgKI(itgb1b-tdTomato)<sup>sk108</sup>*.  
570
- 571 Supplementary file 5. Sequence file for the genomic integration site of *TgKI(eGFP-rab11a)<sup>pd1244</sup>*.
